# Supplementary material for: Learning and Overnight Retention in Declarative Memory in Specific Language Impairment
Source: PLoS One. 2017 Jan 3;12(1):e0169474. doi: 10.1371/journal.pone.0169474 (PMC5207735; doi:10.1371/journal.pone.0169474)
Supplement: S1 Dataset — (XLS) [file pone.0169474.s002.xls]

## Sheet: declarative_hungarian
Group	ID	age (years)	gender	SLI	Raven IQ	NONWORDREPETITION	PPVT	Pictures_Encoding_D'	Pictures_Recognition_D'	Pictures_Retention_D'	Words_Encoding_D'	Words_Recognition_D'	Words_Retention_D'	Pictures_Recognition_Novel_D'	Pictures_Recognition_Real_D'	Pictures_Retention_Novel_D'	Pictures_Retention_Real_D'	Words_Recognition_Novel_D'	Words_Recognition_Real_D'	Words_Retention_Novel_D'	Words_Retention_Real_D'	Pictures_Real_D'	Pictures_Novel_D'	Words_Real_D'	Words_Novel_D'
SLI	101	8.91667	male	1	104	4	66	3.18074	0	1.62887	2.85213	0.0198952	0.157311	0	0	1.53736	2.41305	0.607078	-0.328611	0.212657	0.263203	1.52996	0.906922	0.0881521	0.253678
SLI	102	9.33333	female	1	102	3	101	2.62997	1.6149	2.27164	0.943307	0.358523	0.505403	1.04534	2.328	1.2836	3.04102	-0.173597	0.816334	0.339845	0.649944	2.54779	1.14253	0.724514	0.0646195
SLI	103	9	male	1	98	3	118	2.328	0.0579742	1.06682	3.44135	1.04917	0.580212	-0.619754	0.414979	0.567189	1.72948	0.140359	2.0375	0.0496918	1.24719	1.07731	0.284697	1.61093	0.082922
SLI	104	11	male	1	88	4	123	3.01308	1.03679	2.30253	2.5437	0.532575	1.17543	0.752729	1.41734	2.00671	2.68447	-0.271145	1.89183	0.649944	1.9074	1.93582	1.29462	1.8016	0.203518
SLI	105	9.41667	female	1	93	4	92	-0.422991	0.0312916	-0.0843757	1.73573	0.129093	-0.268131	-0.191828	0.250001	-0.0819568	-0.0873477	-0.15355	0.435727	-0.62271	0.0498029	0.0764523	-0.131868	0.219784	-0.374917
SLI	106	8.83333	male	1	98	3	118	2.07565	1.06495	1.76576	1.80547	0.46705	0.761768	0.648782	1.53647	1.28155	2.43113	-0.156415	1.03963	0.920623	0.608883	1.93246	0.953461	0.816837	0.394382
SLI	107	9.33333	male	1	108	3	123	3.16661	1.81161	1.9805	2.68447	1.05694	0.996676	1.30015	2.42127	1.75162	2.20861	0.976685	1.47048	0.758688	2.02004	2.31054	1.39612	1.62099	0.845144
SLI	108	8.5	male	1	130	5	76	3.72546	2.00628	2.31916	3.06824	0.127236	0.563646	1.2652	3.30422	1.44403	4.01661	-0.933732	1.21669	0.043175	1.14871	3.4609	1.33654	1.1647	-0.422145
SLI	109	8.41667	male	1	102	4	97	2.28932	1.58937	1.96673	2.49792	0.875946	0.327815	0.721021	2.6651	0.291143	2.45984	-0.835864	1.75513	-0.331466	1.06002	2.41644	0.583229	1.32777	-0.351799
SLI	110	8.58333	male	1	98	4	84	2.23599	0.592437	1.34266	3.42275	0.627021	0.597815	0.333982	0.817237	1.13888	1.41253	-0.0278797	0.861018	0.832829	0.435259	1.05931	0.503472	0.664966	0.538425
SLI	111	10.3333	male	1	90	5	114	0.387596	0	-0.122844	2.09443	-0.12038	-0.0795094	0.52413	-0.3355	-0.140359	-0.110725	-0.555841	0.34193	0	-0.140359	-0.222267	0.152343	0.150323	-0.322264
SLI	112	7.83333	male	1	125	3	96	1.56164	1.06109	2.65476	1.26422	0.365073	0.518042	0.872323	1.29688	1.6651	3.30422	-0.544721	0.765559	0.291143	0.523732	2.02826	1.34633	0.636843	-0.261723
SLI	113	9.58333	male	1	110	3	98	1.46628	0.451417	0.306697	2.0375	0.13116	0.0899464	-0.140359	0.913147	0.199918	0.407158	-0.212657	0.40225	0.180153	0	0.708993	-0.00921841	0.210118	0
SLI	114	8.58333	female	1	110	4	80	1.9925	1.17515	1.41094	2.15723	0.642871	0.744171	0.981678	1.7337	1.30766	1.61762	0.362692	0.944316	1.02977	0.500935	1.66586	1.138	0.716205	0.713615
SLI	115	7.08333	male	1	100	0	73	2.13549	0.121863	0.0957489	1.56677	-0.123775	-0.107561	0.168745	0.101932	0.130087	0.0525487	0.212929	-0.515527	0.0432312	-0.308118	0.0784133	0.141423	-0.430337	0.123885
SLI	116	9.91667	female	1	104	4	106	2.9303	1.89714	2.00628	3.47189	-0.118687	0.385414	2.15387	2.42127	2.11325	2.01998	-0.3355	0	0.331466	0.541589	2.17664	2.03936	0.157311	0.0457225
SLI	117	8.08333	male	1	104	5	104	1.92018	2.11349	2.47251	2.01998	1.47884	1.14855	1.8486	2.54411	1.54409	3.30422	1.2836	1.69143	0.843439	1.49044	2.83919	1.69842	1.57631	1.04229
SLI	118	7.08333	female	1	108	2	74	1.75204	-0.106113	1.25362	2.328	-0.239284	-0.0323865	-0.52037	0.450161	1.22876	1.63665	-0.0936705	-0.43993	-0.0432066	-0.0251658	1.07737	0.32779	-0.184777	-0.0572965
SLI	119	9.75	female	1	102	3	111	2.46836	1.54696	1.9735	3.18074	1.19064	0.622526	0.867581	2.43113	1.75162	2.19242	0.852679	1.68448	0.360666	0.852679	2.27689	1.09599	1.19064	0.622526
SLI	120	10	male	1	104	2	132	1.73766	2.05951	2.86266	3.38272	1.41437	0.496126	1.53412	2.83594	2.31119	2.9303	0.997838	1.77132	0.149804	0.748099	2.76437	1.84008	1.2396	0.526413
SLI	121	7.16667	male	1	104	1	72	-0.852236	0.0132126	0.177295	2.44899	-0.114683	0.217307	0.0316067	0	0.167131	0.19291	-0.0336579	-0.383771	0.643521	0.0161914	0.161251	0.131783	-0.208092	0.216958
TD	201	10.25	male	0	94	6	113	0.90442	-0.309396	-0.383152	3.39685	0.30746	0.165048	-0.375588	-0.240962	-0.492013	-0.252021	-0.383771	0.725979	0.748099	-0.235723	-0.253558	-0.433281	0.236275	0.319839
TD	202	9.58333	male	0	116	7	134	3.38272	0.609491	1.13723	3.71133	1.84852	0.774539	-0.0615552	1.41224	0.122844	2.28133	1.77132	1.96733	0.605533	0.949271	1.79208	0.0232249	1.3851	1.0424
TD	203	8.58333	female	0	85	6	113	2.20861	0.483993	1.1797	4.00393	0.776512	1.38671	0.0836517	0.891026	0.528674	1.89714	0.271053	1.29742	0.907227	1.99916	1.34898	0.244745	1.6267	0.555534
TD	204	9.16667	male	0	102	7	136	2.68447	2.82836	2.56309	4.01661	1.68376	2.09713	2.31119	3.39685	2.26498	3.39685	1.53412	2.20516	2.42127	2.11325	3.35188	2.26512	2.14231	1.93637
TD	205	8.75	female	0	102	5	124	3.13037	1.59973	1.63352	4.30775	1.43696	1.2405	0.701338	3.18074	0.793169	2.85213	1.49877	1.47795	1.67638	1.09558	2.95192	0.747161	1.29441	1.54967
TD	206	9	male	0	110	6	136	1.57456	0.933873	0.95539	3.36382	0.142197	0.911692	0.776422	1.24719	1.00999	0.993129	-0.2	0.50072	1.12435	0.725979	1.1082	0.887147	0.599349	0.419847
TD	207	8.75	male	0	100	7	128	2.43113	1.23483	1.6125	2.328	0.866274	1.2165	0.571217	2.01998	1.69732	1.7803	0.851762	1.17249	1.8486	0.821275	1.88672	0.950904	0.944341	1.33961
TD	208	8.83333	male	0	119	8	129	3.688	2.20935	2.36166	3.47189	1.62127	1.40699	1.53412	3.18074	2.22485	2.54411	1.46899	1.92677	1.85276	1.24151	2.82629	1.79482	1.56223	1.63665
TD	209	7.66667	male	0	125	6	102	2.08656	1.86273	2.01416	3.38066	1.37055	1.13323	1.91667	1.77132	1.60143	2.09993	1.31801	1.51422	1.26714	1.00999	1.91314	1.76641	1.23911	1.26467
TD	210	11	male	0	98	8	128	2.68447	1.15145	0.646102	3.05205	1.33094	0.716743	0.541589	1.72948	0.39837	0.897772	1.07217	1.72948	0.243762	1.30781	1.27561	0.451417	1.4392	0.467392
TD	211	8.58333	male	0	102	7	128	2.46836	2.07064	2.34288	4.00393	1.60072	1.05072	1.13187	3.71133	1.61253	3.71133	1.14416	2.28932	1.24723	0.965559	3.71133	1.37681	1.54238	1.17804
TD	212	8.08333	male	0	110	6	108	2.328	1.6485	2.0265	2.05378	0.91157	0.72094	0.843439	2.51206	1.01022	2.37167	0.246443	1.6811	0.687668	0.812338	2.41816	0.870812	1.2073	0.340171
TD	213	7.08333	male	0	96	5	106	1.14598	0.911454	0.763043	3.30422	0.951673	0.811725	0.795161	0.692499	-0.156062	1.26603	0.570438	1.37272	0.94706	0.695186	0.998684	0.290108	1.00583	0.780077
TD	214	8.91667	male	0	114	7	146	3.688	2.72697	3.09374	4.01661	2.04253	2.68447	2.16034	3.71133	3.06824	3.18074	1.89714	2.20516	2.42127	3.06824	3.38884	2.54787	2.56815	2.14231
TD	215	7.16667	male	0	119	6	120	2.31054	0.696902	1.35061	3.688	0.794983	0.47479	-0.15879	1.80679	0.933732	1.9925	0.634049	0.981382	0.161329	0.854834	1.77729	0.363074	0.911692	0.389142
TD	216	7.08333	female	0	119	7	106	2.88179	2.58599	2.64902	3.39685	1.42647	1.55275	1.60143	3.13804	1.91667	2.91762	0.975585	1.94948	1.36478	1.65571	3.02183	1.76641	1.78164	1.15024
TD	217	9.33333	female	0	88	4	119	2.9066	1.59902	0.356307	3.28485	1.17399	1.31708	1.6168	1.67244	-0.566699	1.30951	1.26673	1.22876	0.96145	1.37745	1.44791	0.414502	1.15483	1.09361
TD	218	9.91667	female	0	113	7	138	2.74988	1.90191	1.9805	4.01661	0.737246	0.194256	1.26673	2.54411	1.14388	3.06824	0.643521	0.981382	0.268009	0.176449	2.76398	1.20709	0.814249	0.557674
TD	219	10.0833	male	0	108	7	139	3.01308	1.93637	2.12104	3.72546	0.820304	0.845185	1.62553	2.63602	1.91667	2.85213	0.292238	1.47795	0.441019	1.35367	2.73581	1.75023	1.41402	0.36243
TD	220	8.91667	female	0	119	7	127	3.98979	1.37012	1.85862	3.39685	1.43578	0.69613	0.374172	2.85213	1.59525	2.41093	1.29692	1.63913	0.437288	1.00939	2.60933	0.811472	1.32078	0.772788
TD	221	9	male	0	116	7	133	3.38272	0.8111	1.49526	3.39685	1.12134	1.07969	0.0836107	1.68448	0.863455	2.3007	0.927587	1.34898	1.31824	0.886526	1.96466	0.421534	1.10715	1.1129
